# Supplementary figures and images for: Efficient recognition of facial expressions does not require motor simulation
Source: eLife journal article supplement (doi:10.7554/elife.54687), 2020-05-04

A

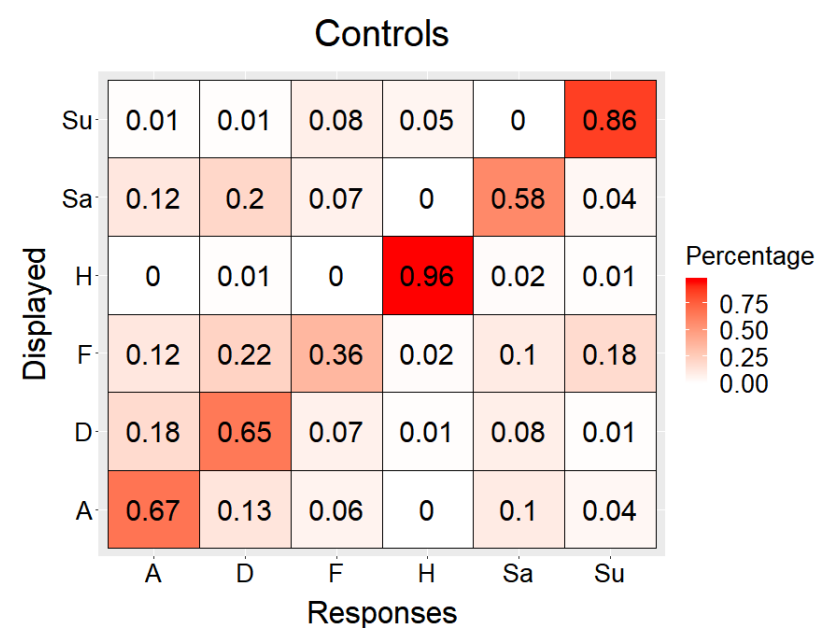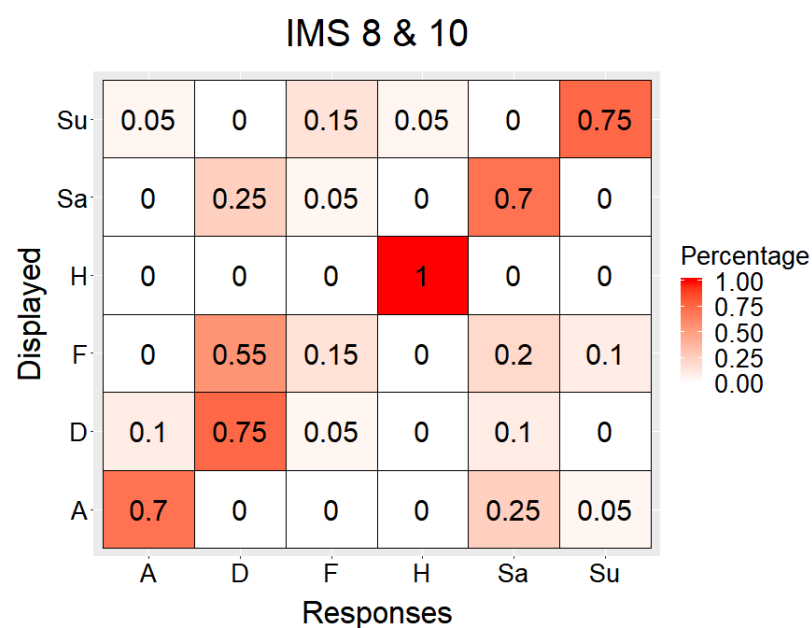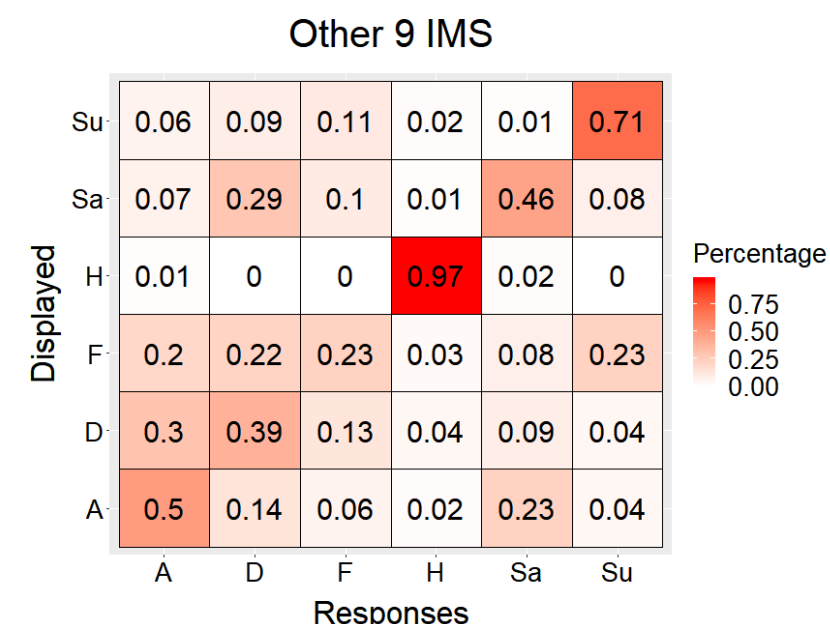

B

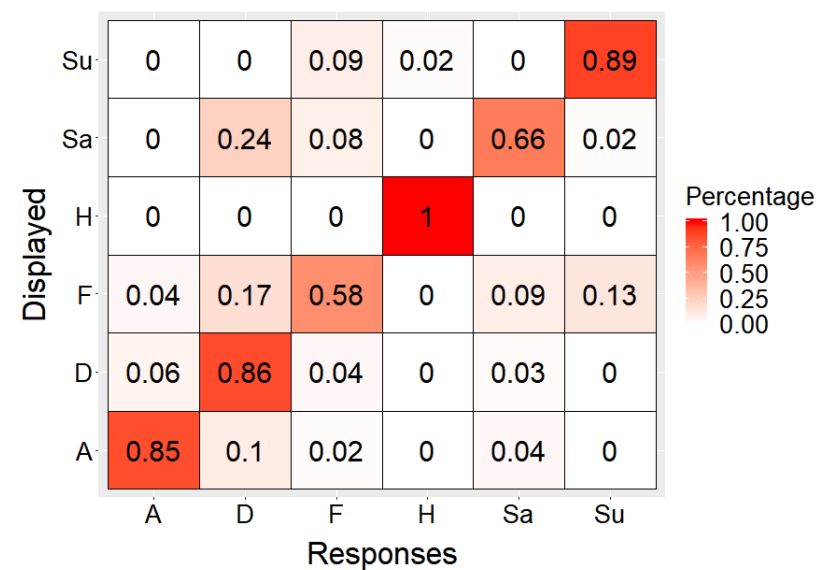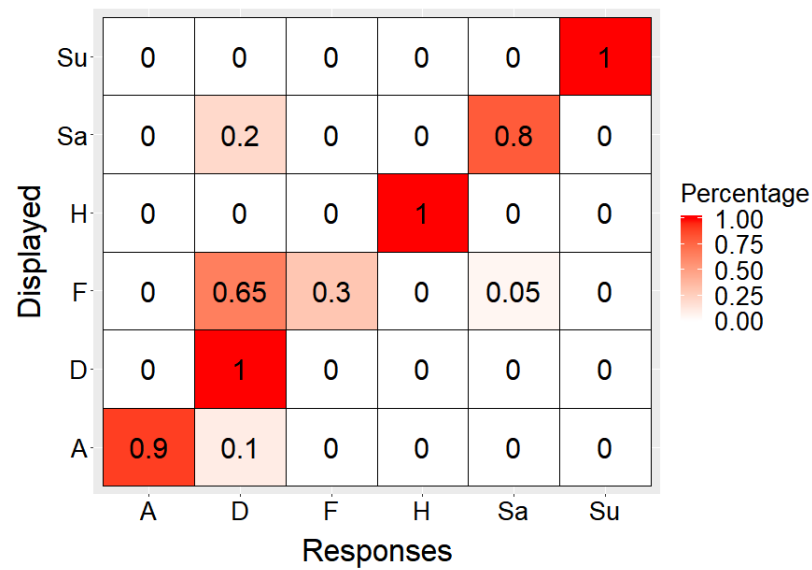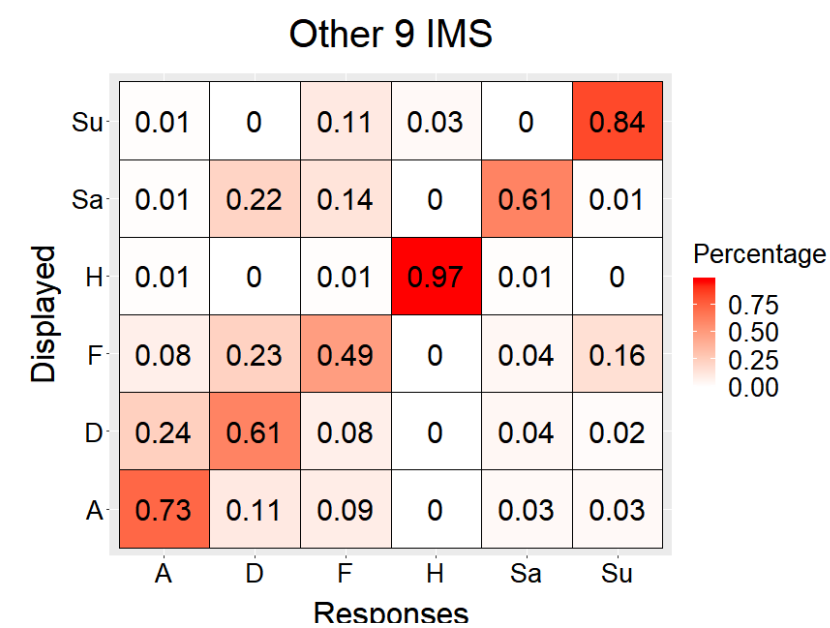

C

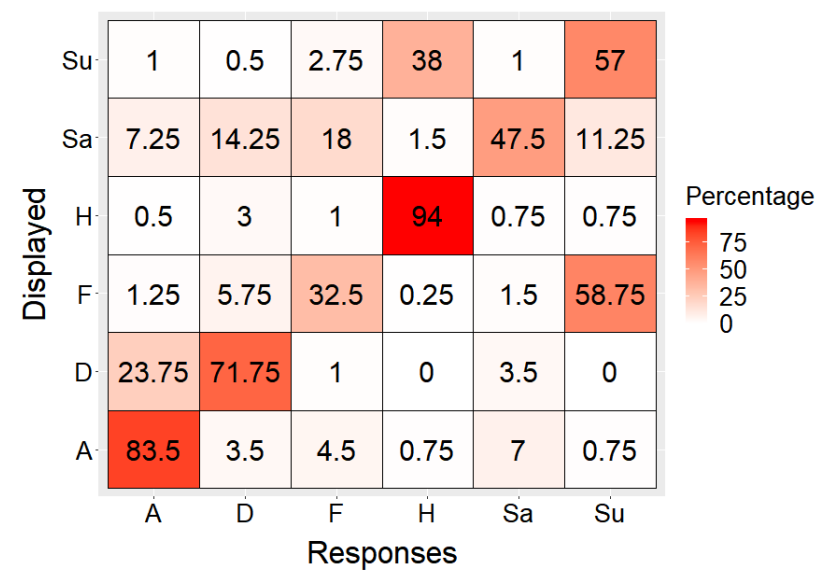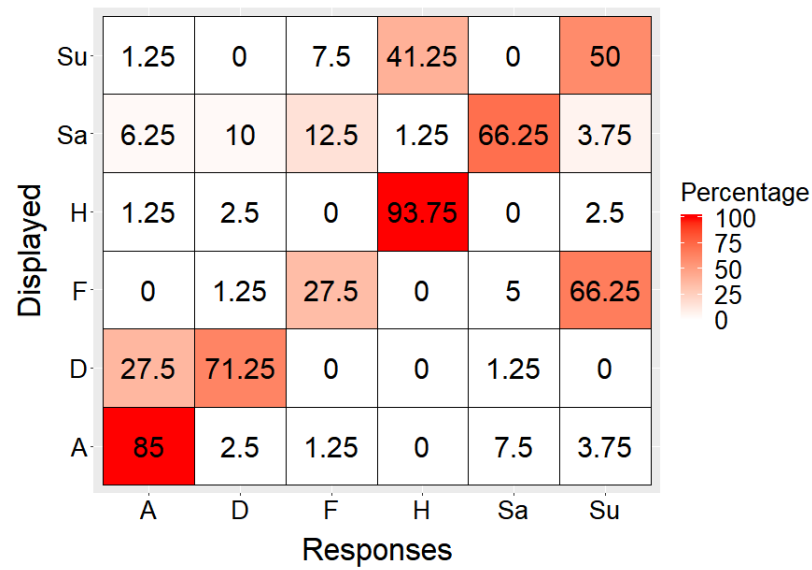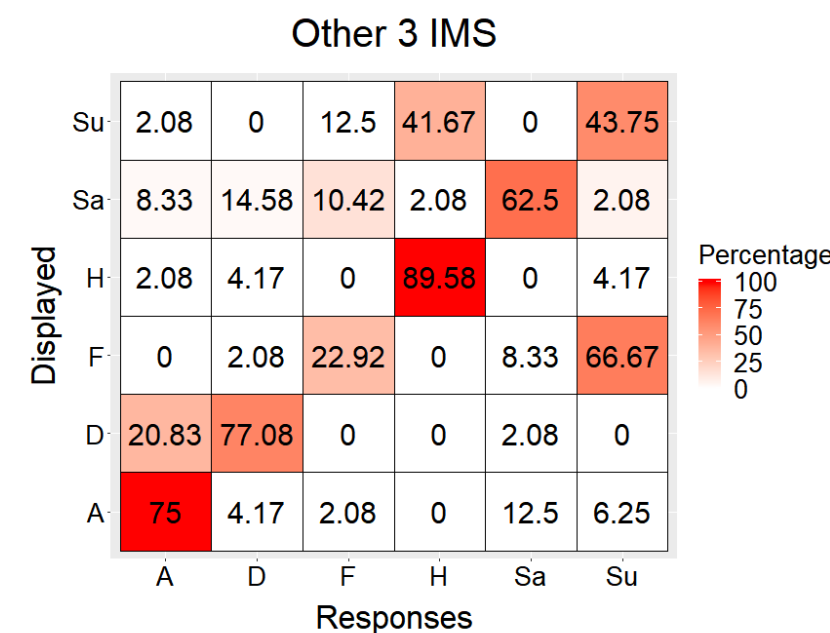

Supplement: supp [file elife_poa_e54687_Figure_2_figure_supplement_1.pdf › elife_poa_e54687_Figure_2_figure_supplement_1.pdf]

IMS8

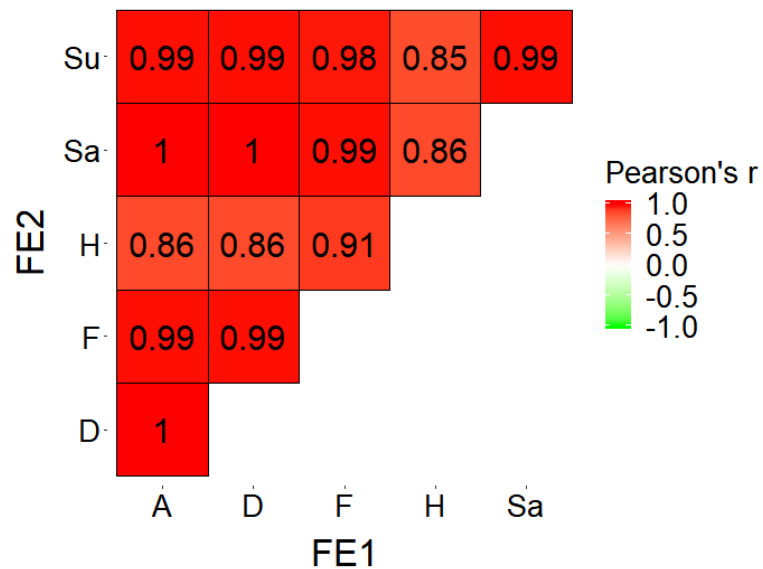

IMS10

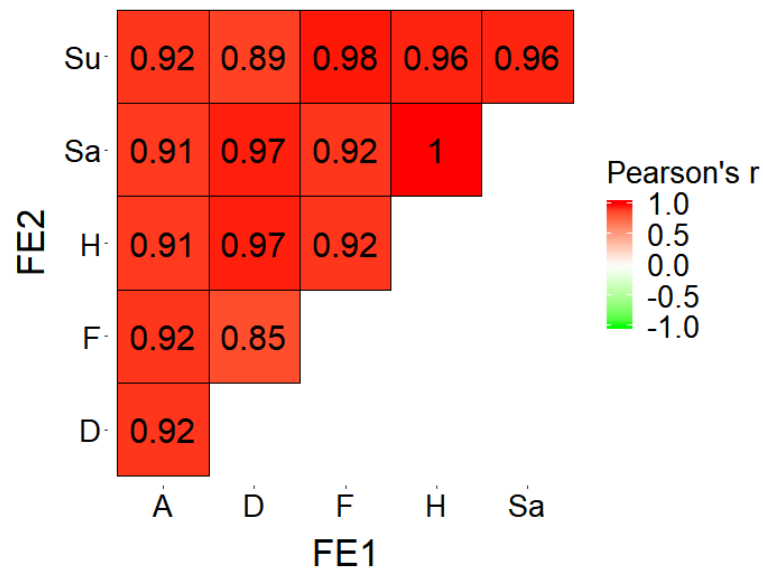

C1

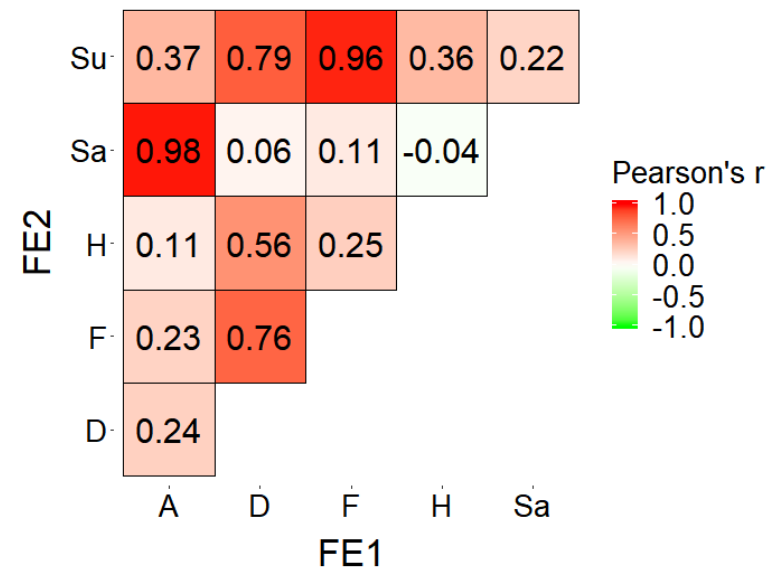

C2

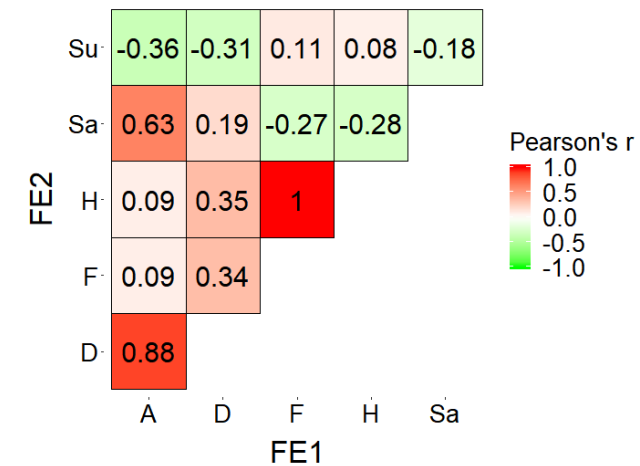

C3

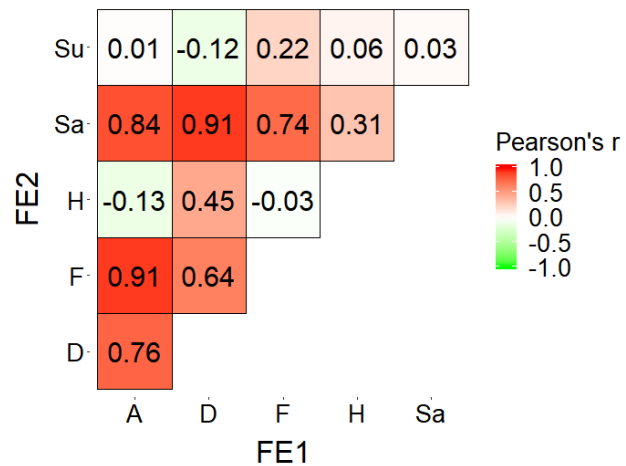

C4

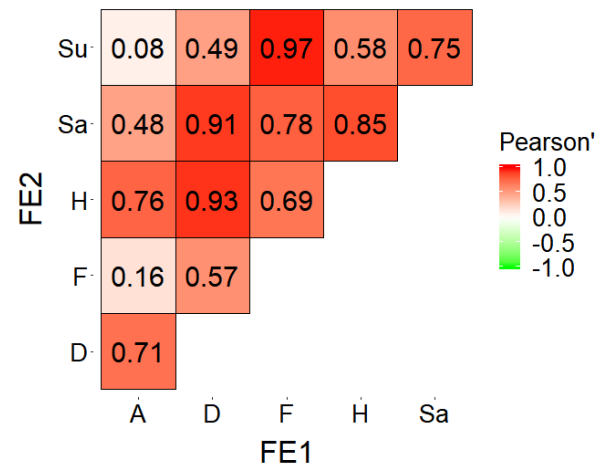

C5

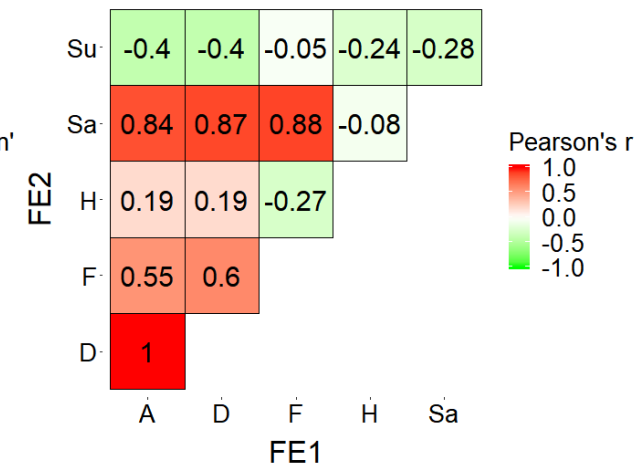

Supplement: supp [file elife_poa_e54687_Figure_2_figure_supplement_2.pdf › elife_poa_e54687_Figure_2_figure_supplement_2.pdf]

A

KDEF

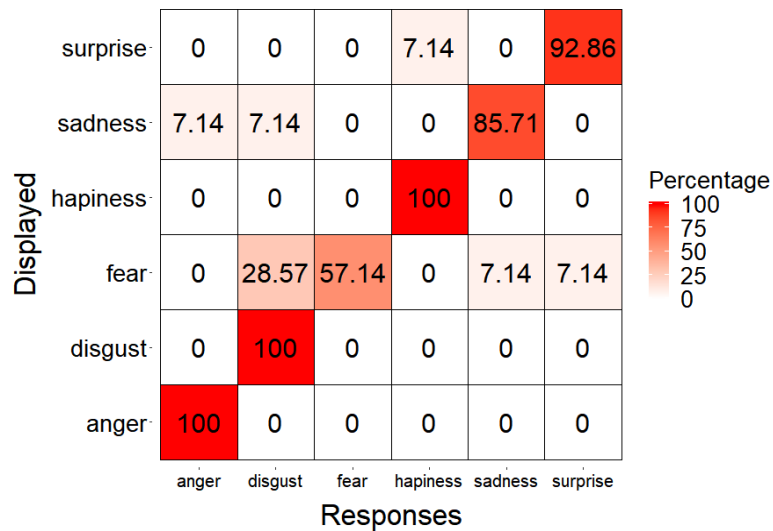

IMS8

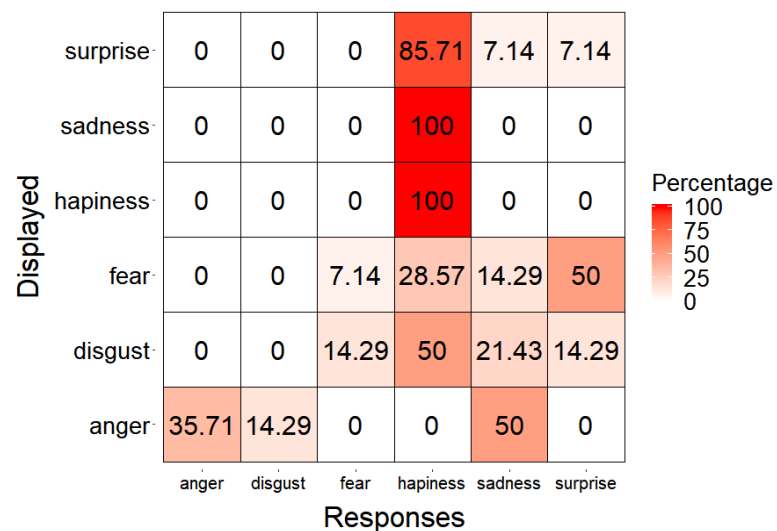

IMS10

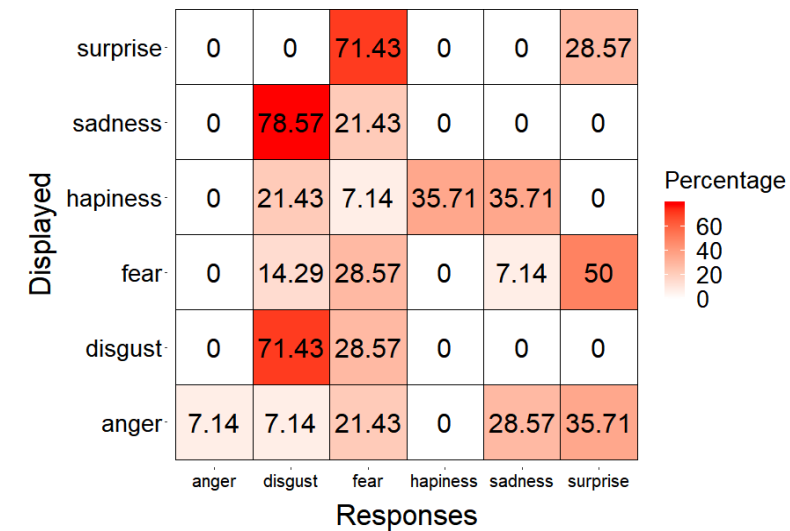

B

KDEF

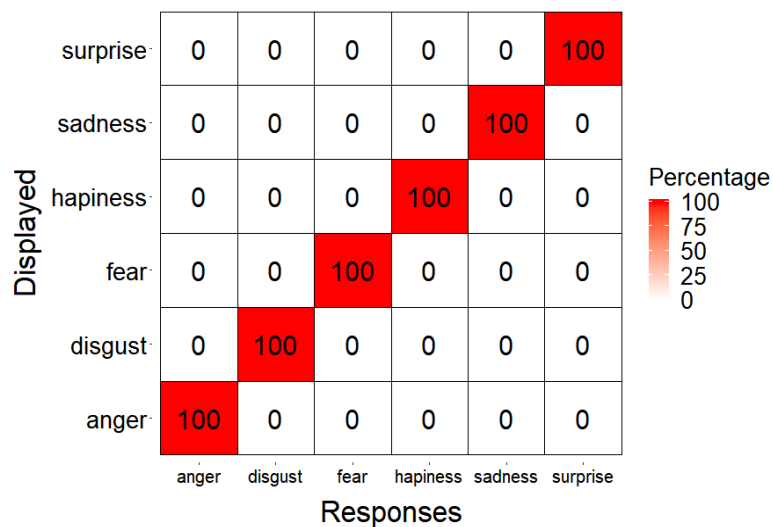

IMS8

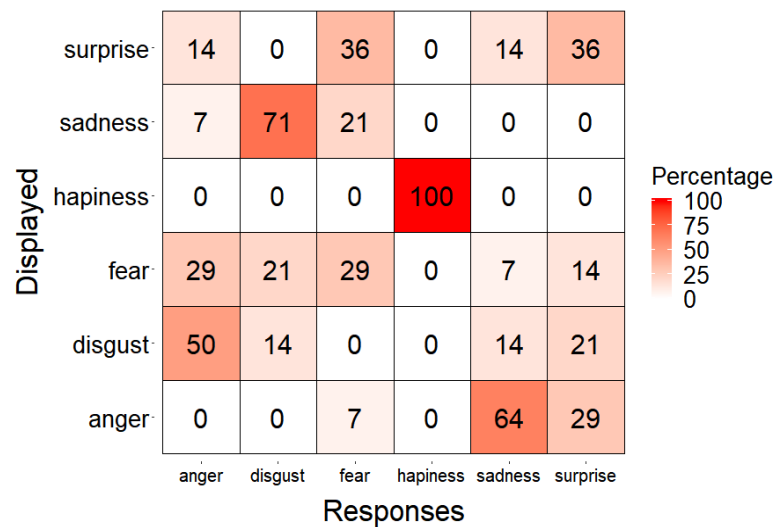

IMS10

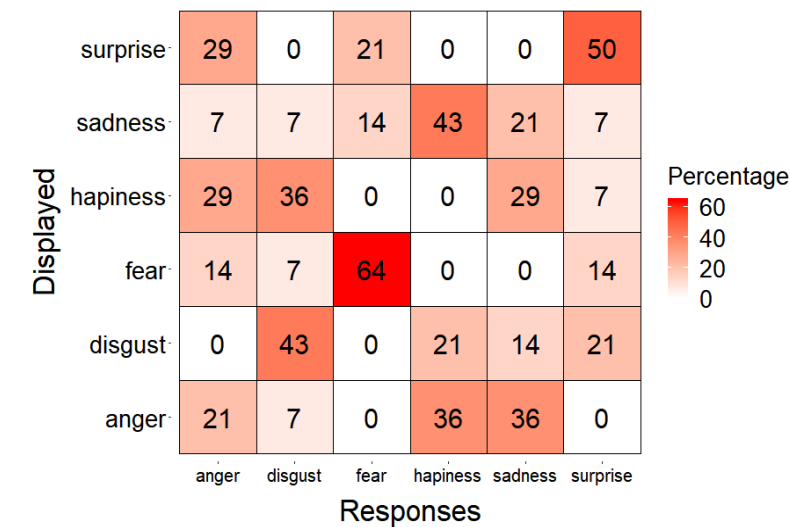

Supplement: supp [file elife_poa_e54687_Figure_2_figure_supplement_3.pdf › elife_poa_e54687_Figure_2_figure_supplement_3.pdf]
